# Supplementary material
Source: publisher site journal article supplement (https://www.dovepress.com/article/550698)
Supplement: Supplementary file 1 [file 550698_Supplementary%20%2525281%252529.docx]

**Supplementary Table 1 Internal Consistency and Test–Retest Reliability of the HAPA Questionnaire Subscales in Older Adults with Type 2 Diabetes**

| **Subscale** | **No. of Items** | **Cronbach’s α** | **ICC (2-week)** |
| --- | --- | --- | --- |
| **Intention to Adhere** | 2 | 0.79 | 0.84 |
| **Task Self-Efficacy** | 6 | 0.82 | 0.85 |
| **Coping Self-Efficacy** | 7 | 0.83 | 0.87 |
| **Recovery Self-Efficacy** | 3 | 0.78 | 0.83 |
| **Action Planning** | 2 | 0.85 | 0.86 |
| **Coping Planning** | 6 | 0.86 | 0.88 |
| **Perceived Barriers** | 9 | 0.87 | 0.89 |
| **Perceived Resources & Benefits** | 3 | 0.76 | 0.83 |
| **Total Score** | 38 | 0.84 | 0.87 |

All subscales demonstrated acceptable to strong internal consistency (α = 0.76–0.87) and good test–retest stability over two weeks (ICC = 0.83–0.89). The perceived barriers and coping planning subscales showed the highest reliability, while resources/benefits had the lowest but still adequate coefficients.

**Supplementary Table 2** Pearson Correlation coefficients between HAPA components

| **Variable** | **Intention to medications adherence** | **Task self-efficacy** | **Copping self-efficacy** | **Recovery self-efficacy** | **Action planning** | **Copping planning** | **Barriers to adherence** | **Resources and benefits** |
| --- | --- | --- | --- | --- | --- | --- | --- | --- |
| **Intention to medications adherence** | 1 |  |  |  |  |  |  |  |
| **Task self-efficacy** | -.216 | 1 |  |  |  |  |  |  |
| **Copping self-efficacy** | -.461 | -.568 | 1 |  |  |  |  |  |
| **Recovery self-efficacy** | -.371 | -.355 | -.511 | 1 |  |  |  |  |
| **Action planning** | -.361 | -.331 | -.470 | -.380 | 1 |  |  |  |
| **Copping planning** | -.290 | -.429 | -.501 | -.406 | -.496 | 1 |  |  |
| **Barriers to adherence** | .312 | .164 | .344 | .242 | .362 | .185 | 1 |  |
| **Resources and benefits** | -.507 | -.108 | -.187 | -.187 | -.133 | -.117 | -.194 | 1 |

Unfavorable adherence correlated positively with perceived barriers (r = .312) and negatively with all motivational and volitional HAPA constructs. The strongest inverse associations appeared for intention (r = –.507) and coping self-efficacy (r = –.461), indicating that lower self-regulatory capacity and reduced intention are most closely linked with poor adherence.

**Supplementary Table 3** Medication adherence rates in older adults with type 2 diabetes

| **Adherence status** | **Krousel-Wood categories** | **MMAS-8**  **score** | **Frequency** | **Percent** |
| --- | --- | --- | --- | --- |
| **Unfavorable adherence** | Low adherence | 1 | 4 | 1.54 |
| 2 | 7 | 2.70 |
| 3 | 29 | 11.20 |
| 4 | 33 | 12.74 |
| 5 | 62 | 23.94 |
| **Favorable adherence** | Medium adherence | 6 | 68 | 26.25 |
| 7 | 42 | 16.22 |
| High adherence | 8 | 14 | 5.41 |

Low and medium adherence categories together accounted for most participants, with unfavorable adherence forming 52.1% of the sample. Only a small proportion achieved high adherence (5.4%), suggesting that optimal medication-taking behavior is uncommon among these older adults.

**Supplementary Table 4** Frequency and percentage of perceived barriers to medication adherence by older adult diabetics

| **Barrier questions** | **Disagree**  **n (%)** | **No opinion**  **n (%)** | **Agree**  **n (%)** |
| --- | --- | --- | --- |
| Q1: It is difficult for me to take medications or inject insulin on time | 99 (38.2) | 70 (27.0) | 90 (34.7) |
| Q2: It is difficult for me to inject my insulin. | 96 (37.1) | 66 (25.5) | 97 (37.5) |
| Q3: It is unbearable and high cost of medications or insulin for me to buy. | 48 (18.5) | 48 (18.5) | 163 (62.9) |
| Q4: I don't have a good feeling about taking a large number of medications. | 56 (21.6) | 83 (32.0) | 120 (46.3) |
| Q5: I forget to take my medication and/or inject insulin at work and/or home. | 70 (27.0) | 62 (23.9) | 127 (49.0) |
| Q6: My surroundings think about me badly (stigma) when injecting insulin. | 115 (44.4) | 64 (24.7) | 80 (30.9) |
| Q7: It is difficult for me to keep insulin on the trips (keeping the insulin temperature). | 65 (25.1) | 50 (19.3) | 144 (55.6) |
| Q8: I am not pleased with the pain of insulin injection. | 87 (33.6) | 78 (30.1) | 94 (36.3) |
| Q9: At parties, I don't feel comfortable injecting insulin. | 90 (34.7) | 70 (27.0) | 99 (38.2) |

Cost concerns were the most frequently endorsed barrier (62.9%). Travel-related insulin storage (55.6%) and forgetfulness at home or work (49.0%) were also commonly reported. Stigma-related discomfort was less prevalent (30.9–38.2%), while injection difficulty and timing challenges showed moderate agreement.

**Supplementary Table 5:** Variables Included in Regression Models

| **Variable Category** | **Specific Variables** | **Included in Linear Regression (Table 3)?** | **Included in Logistic Regression (Table 4)?** |
| --- | --- | --- | --- |
| **HAPA Constructs** | Intention, Task Self-efficacy, Coping Self-efficacy, Recovery Self-efficacy, Action Planning, Coping Planning, Perceived Barriers, Perceived Resources/Benefits | Yes | Yes |
| **Demographic & Clinical Factors** | Age, Sex, Educational Level, Retirement Status, Economic Adequacy, Comorbidity, Duration of Diabetes | No | Yes |

All HAPA components were entered into both linear and logistic regression models, whereas demographic and clinical characteristics were included only in the logistic model. This structure reflects a focus on behavioral constructs while adjusting for background factors when predicting adherence status.
